# Supplementary material for: Hindgut microbiota in laboratory-reared and wild Triatoma infestans
Source: PLoS Negl Trop Dis. 2019 May 6;13(5):e0007383. doi: 10.1371/journal.pntd.0007383 (PMC6522061; doi:10.1371/journal.pntd.0007383)
Supplement: S2 Table — In the complete dataset of 69 triatomines we identified 32 taxa at the taxonomic rank of order. (XLSX) [file pntd.0007383.s002.xlsx]

## Sheet: Sheet1
Order	Frequency in all 16S sequences of wild insect	Frequency in all 16S sequences of lab insect	Found in lab insects?
o__[Borreliales]	0.0146162	0.00433125	yes
o__[Chthoniobacterales]	0.0127424	0.01155	yes
o__[Rhodothermales]	0.0131171	0	no
o__[Saprospirales]	0.149348	0.000721876	yes
o__Actinomycetales	17.2942	0.177581	yes
o__Alteromonadales	0.029982	0	no
o__Bacillales	9.03939	2.541	yes
o__Bacteroidales	0.369341	0.0433125	yes
o__Burkholderiales	14.6869	0.549347	yes
o__Caldilineales	0.0164901	0.00360938	yes
o__Campylobacterales	0.161528	0	no
o__Caulobacterales	2.37589	0.00866251	yes
o__Clostridiales	0.646488	0.281532	yes
o__Cytophagales	0.0134919	0	no
o__Deinococcales	0.0312937	0	no
o__Desulfovibrionales	0.0558415	0.0194906	yes
o__Enterobacteriales	7.619	36.9759	yes
o__Flavobacteriales	0.057528	0.195628	yes
o__Gemmatales	0.0226739	0.0158813	yes
o__Lactobacillales	7.88265	58.7961	yes
o__Oceanospirillales	0.0168649	0	no
o__Pseudomonadales	7.72393	0.123441	yes
o__Rhizobiales	28.0905	0.168919	yes
o__Rhodobacterales	0.150098	0.00649688	yes
o__Rhodocyclales	0.029982	0.0158813	yes
o__Rickettsiales	0.0537803	0.0187688	yes
o__Rubrobacterales	0.0144289	0.000721876	yes
o__Sphingobacteriales	0.0773911	0	no
o__Sphingomonadales	3.17453	0.0202125	yes
o__Synergistales	0.0481586	0	no
o__Turicibacterales	0.0140541	0.00144375	yes
o__Xanthomonadales	0.113744	0.0194906	yes
